# Supplementary material
Source: publisher figshare collection journal article supplement (https://karger.figshare.com/ndownloader/files/22913927)
Supplement: Supplementary file 1 [file 22913927]

**Supplement Table 1:** Skewness and number of extreme outliers in metric variables at baseline and in changes at follow-up, n = 36 to 335

| Parameter                                     | Baseline |          |                                         | Changes from baseline to follow-up |          |                                         |
|-----------------------------------------------|----------|----------|-----------------------------------------|------------------------------------|----------|-----------------------------------------|
|                                               | n        | Skewness | Number of extreme outliers <sup>#</sup> | n                                  | Skewness | Number of extreme outliers <sup>#</sup> |
| Overall well-being, KINDL-AB                  | 335      | -0.504   | 0                                       | 109                                | -0.010   | 0                                       |
| Physical well-being, KINDL-AB                 | 335      | -0.062   | 0                                       | 113                                | -0.324   | 0                                       |
| Psychological well-being, KINDL-AB            | 335      | -0.699   | 0                                       | 117                                | 0.019    | 0                                       |
| Family-related well-being, KINDL-AB           | 304      | -1.386   | 0                                       | 99                                 | -0.408   | 0                                       |
| Friend-related well-being, KINDL-AB           | 321      | -0.995   | 5                                       | 108                                | -0.173   | 1                                       |
| Education / work-related well-being, KINDL-AB | 227      | -1.182   | 0                                       | 60                                 | -1.808   | 2                                       |
| EQ-IV                                         | 241      | -1.693   | 0                                       | 90                                 | 0.025    | 3                                       |
| EQ-VAS                                        | 248      | -0.959   | 0                                       | 96                                 | -0.247   | 1                                       |
| SF-36, Physical functioning                   | 136      | -0.952   | 0                                       | 38                                 | 0.839    | 2                                       |
| SF-36, Physical role functioning              | 133      | -0.525   | 0                                       | 36                                 | 0.201    | 0                                       |
| SF-36, Bodily pain                            | 135      | -0.246   | 0                                       | 37                                 | -0.013   | 0                                       |
| SF-36, General health perceptions             | 134      | -0.199   | 0                                       | 38                                 | 0.037    | 0                                       |

|                                   |     |        |   |    |        |   |
|-----------------------------------|-----|--------|---|----|--------|---|
| SF-36, Vitality                   | 136 | -0.460 | 0 | 38 | -0.069 | 0 |
| SF-36, Social role functioning    | 134 | -1.066 | 0 | 36 | 0.033  | 0 |
| SF-36, Emotional role functioning | 132 | -0.956 | 0 | 36 | 0.604  | 0 |
| SF-36, Mental health              | 136 | -0.692 | 0 | 38 | 0.194  | 0 |

KINDL-AB = adult brief version of the revised KINDL questionnaire; EQ-IV = EQ-5D-3L Index value of the EQ-5D-3L questionnaire; EQ-VAS = EQ-5D visual analogue scale; SF-36 = Short Form (36) Health Survey; # = values more than 3 times the inter-quartile range (IQR) distant from the median.

**Supplement Table 2:** Response (n and % of all eligible) in association with socio-economic status variables, n=329 – 332 eligible

| KINDL-AB item                                                                                                  | Socio-economic status variable of all eligible |                                                                                                                                                           |                                        |
|----------------------------------------------------------------------------------------------------------------|------------------------------------------------|-----------------------------------------------------------------------------------------------------------------------------------------------------------|----------------------------------------|
|                                                                                                                | working (half- or fulltime)<br>(n=177)         | housewife or house husband,<br>non-working, temporarily laid<br>off OR unemployed, mini-job,<br>(one-euro) community jobs,<br>voluntary service<br>(n=61) | retired / retired + mini job<br>(n=94) |
| 11: During the past week ... Doing the duties at school / in education / at the job was easy. (n=332 eligible) | 165 (93.2%)                                    | 34 (55.7%)                                                                                                                                                | 28 (29.8%)                             |
| 12: During the past week ... I found school / education / job interesting. (n=332 eligible)                    | 165 (93.2%)                                    | 35 (57.4%)                                                                                                                                                | 25 (26.6%)                             |
|                                                                                                                |                                                |                                                                                                                                                           |                                        |
|                                                                                                                | Married, living with the partner<br>(n=233)    | Divorced, married but living separate, widowed<br>(n=26)                                                                                                  | Single<br>(n=69)                       |
| 7: During the past weeks ... I got on well with my partner. (n=328 eligible)                                   | 233 (100%)                                     | 19 (73.1%)                                                                                                                                                | 46 (66.7%)                             |
| 8: During the past week ... I felt fine at home. (n=328 eligible)                                              | 233 (100%)                                     | 22 (84.6%)                                                                                                                                                | 52 (75.4%)                             |

KINDL-AB = adult brief version of the revised KINDL questionnaire.

Supplement Figure 1: Diagnoses of patients with thrombophilia, n = 260

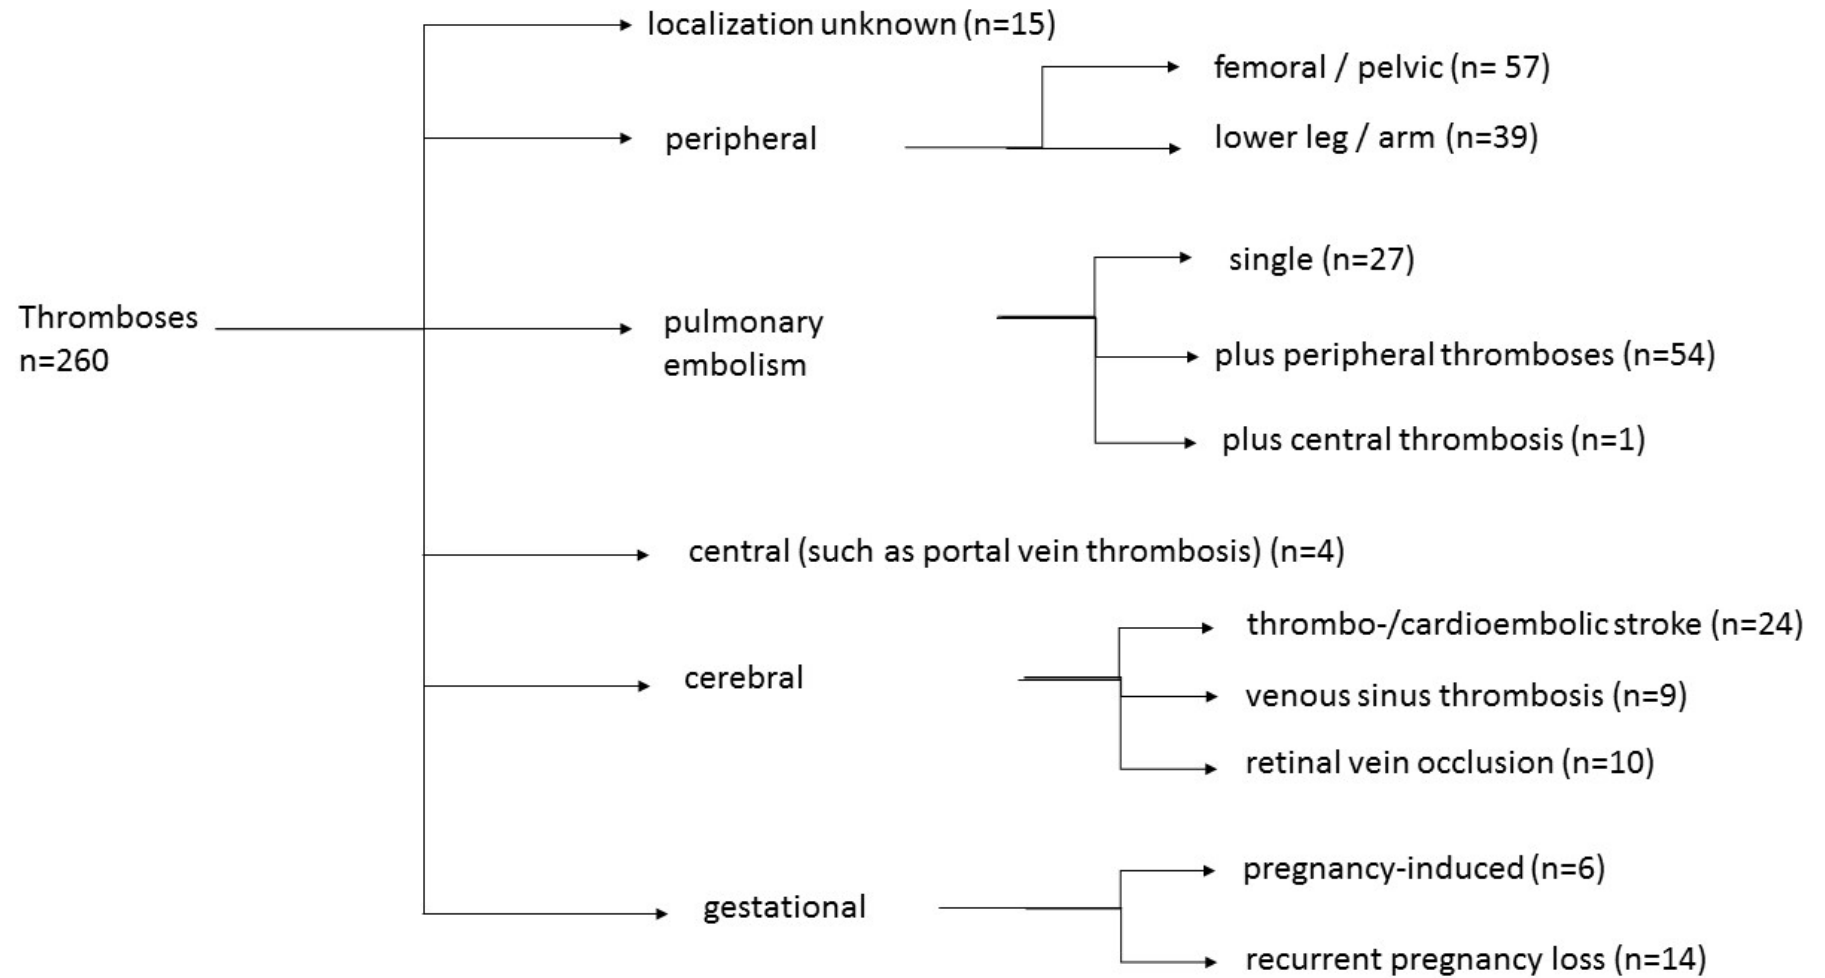

Supplement Figure 2: Diagnoses of patients with hereditary and acquired bleeding disorders, n = 75

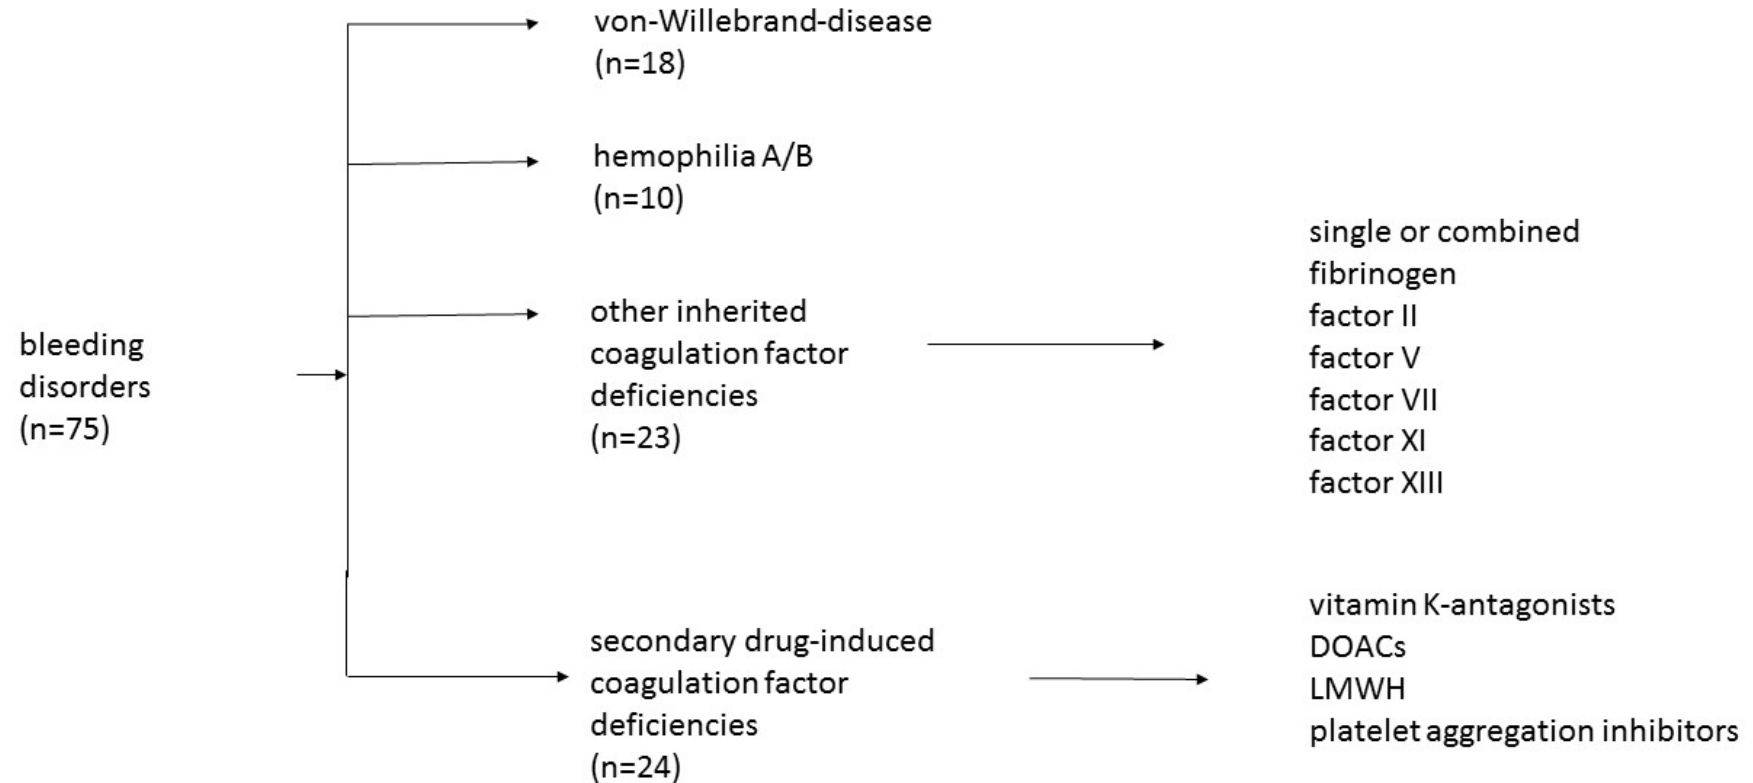

DOAC = directly acting oral anticoagulants; LMWH = Low-molecular-weight heparin.

Supplement 3: KINDL-AB questionnaire, preliminary version, not yet validated in English

1. First of all, we would like to know something about your physical health...

| <u>During the past week...</u>          | never | seldom | some-times | often | all the time |
|-----------------------------------------|-------|--------|------------|-------|--------------|
| 1. ... I felt ill                       |       |        |            |       |              |
| 2. ... I was tired and worn-out         |       |        |            |       |              |
| 3. ... I felt strong and full of energy |       |        |            |       |              |

2. ... then something about how you've been feeling ...

| <u>During the past week...</u>           | never | seldom | some-times | often | all the time |
|------------------------------------------|-------|--------|------------|-------|--------------|
| 1. ... I had fun and laughed a lot       |       |        |            |       |              |
| 2. ... I felt scared or unsure of myself |       |        |            |       |              |
| 3. ... I felt on top of the world        |       |        |            |       |              |

3. The next questions are about your partner

| <u>During the past week...</u>       | never | seldom | some-times | often | all the time |
|--------------------------------------|-------|--------|------------|-------|--------------|
| 1. ... I got on well with my partner |       |        |            |       |              |
| 2. ... I felt fine at home           |       |        |            |       |              |

4. ... and then about your friends.

| <u>During the past week...</u>           | never | seldom | some-times | often | all the time |
|------------------------------------------|-------|--------|------------|-------|--------------|
| 1. ... I was a "success" with my friends |       |        |            |       |              |
| 2. ... I got along well with my friends  |       |        |            |       |              |

13. Last of all, we would like to know something about school / training / occupation

| <u>During the past week...</u>                                 | never | seldom | some-times | often | all the time |
|----------------------------------------------------------------|-------|--------|------------|-------|--------------|
| 1. ... I mastered the duties at school / training / occupation |       |        |            |       |              |
| 2. ... I found school / training / occupation interesting      |       |        |            |       |              |
